# Supplementary material for: Impact of supercritical extraction on solid fuel wood pellet properties and off-gassing during storage
Source: Royal Society of Chemistry journal article supplement (doi:10.1039/c5gc02479j), 2016-01-01
Supplement: c5gc02479j1.xlsx [file c5gc02479j1.xlsx]

## Sheet: sawdust economics
Costings		CUT CO2 Pump						CUT CO2 Heater			heat capacity	20.19	Mj kg-1	CUT CO2 refridg			Heating the biomass
		extraction pressure	350	bar				delta T	51	oK				delta T	16	oK	delta T	35	oK
name	abbeviation	extraction temp	55	oC	kj	1.00106e+06		Cp	0.874	kj kg-1 K-1				Cp	0.846	kj kg-1 K-1	Cp	0.9	kj kg-1 K-1
fixed capital investment	FCI	enthalpy	297.2	kj kg-1	kw	278.072		Mass	3368.3	kg h-1	mass sawdust needed to heat	14.8726	kg run-1	Mass	3368.3	kg h-1	Mass	150	kg run-1
Operational labour costs	COL	loading	150	kg run-1								0.0148726	tonne run-1	COP 20	0.08
Raw Material Costs	CRM	flowrate	22.4553	kg kg-1h-1				Q 50 % effeciency	300277	kj h-1		176.686	tonne year -1	COP 4	0.15		Q 50 % effeciency	9450	kj run-1
Cost of waste	CWT	cost electricity	0.112	euro per kwh	cost	31.144			300.277	Mj h-1				Q	85487.3	kj h-1		9.45	Mj run-1
Cost of utilities	CUT	product	131.509	kg run-1										power	23.7465
		euro	tonne	hour										cost	2.65961		Mass of sawdust needed to heat	0.468053	kg run-1
		abbreviation	value	unit	units per year	lower	upper	cost per year										0.000468053	tonne run-1
		FCI	1400000	1	n/a			n/a										5.56048	tonne year -1
		COL	5	hour	15840			79200	tonne sawdust produced per extract	time per extract	tonne sawdust /year	extracts a year
Cost of manufacture		CRM	34	tonne	1562.33	29.47	78.76	53119.3	0.131509	0.666667	1562.33	11880
		CWT	0					0
		CUT	33.8036	hour	7920			267725
		CUT CO2 Pump	31.144	hour	7920			246661
		CUT CO2 Heater	0.0223088	tonne hr sawdust	7920			176.686
		CUT CO2 refridg	2.65961	hour	7920			21064.1
		CUT biomass heater	0.00070208	tonne hr sawdust	1
		COM	1.00285e+06	year
		wax year	32.809					Wax		units
								extract yield	0.021	%/100
		COM per tonne sawdust	641.896	euro tonne-1				FRA per run kg	3.15	kg run-1
		COM per tonne FRAs	30566.5	euro tonne-1				kg year	37422	kg year-1
		COM per kg FRAs	30.5665	euro kg-1				tonne year	37.422	tonne year-1

## Sheet: sensitivity 
	COM tonne-1 sawdust	difference
Current COM	641.9	0
10% increase FCI	666.99	25.09
10% decrease FCI	616.81	-25.09
10% increase COL per hour	655.74	13.84
10% decrease COL per hour	628.06	-13.84
10% increase CRM per tonne	646.08	4.18
10% decrease CRM per tonne	637.71	-4.19
10% increase in electricty cost	662.97	21.07
10% decrease in electrity cost	620.82	-21.08
Current COM	641.9	0
10% increase FCI	25.09
10% decrease FCI	-25.09
10% increase COL per hour	13.84
10% decrease COL per hour	-13.84
10% increase CRM per tonne	4.18
10% decrease CRM per tonne	-4.19
10% increase in electricty cost	21.07
10% decrease in electrity cost	-21.08

## Sheet: Metrics
Metrics
	Semi-Pilot	Pilot
Yield (%)	2.6	2.1
Mass of biomass post-extraction (g)	1753.2	146850
FRAs generated (g)	46.8	3150
Total (g)	1800	150000
Mass of CO2 (recycled)	887	70960
Reactor volume (m3)	0.005	0.4
Extraction time (hours)	6	0.67
									887
									0.887
									0.666667
Metrics	Semi-Pilot	Pilot
E-factor	0.532626	0.504665
Extraction Mass efficiency	97.4	97.9
PMI	1.53263	1.50466
Renewables intensity	1.53263	1.50466
Renewables percentage	100	100
Space time yield	58.44	6.54179
